# Supplementary material for: Intracellular Diversity of the V4 and V9 Regions of the 18S rRNA in Marine Protists (Radiolarians) Assessed by High-Throughput Sequencing
Source: PubMed Central journal article supplement (PMC4121268; doi:10.1371/journal.pone.0104297), 2014-08-04

# Secondary structure of V4 reads of Ei 44\_1

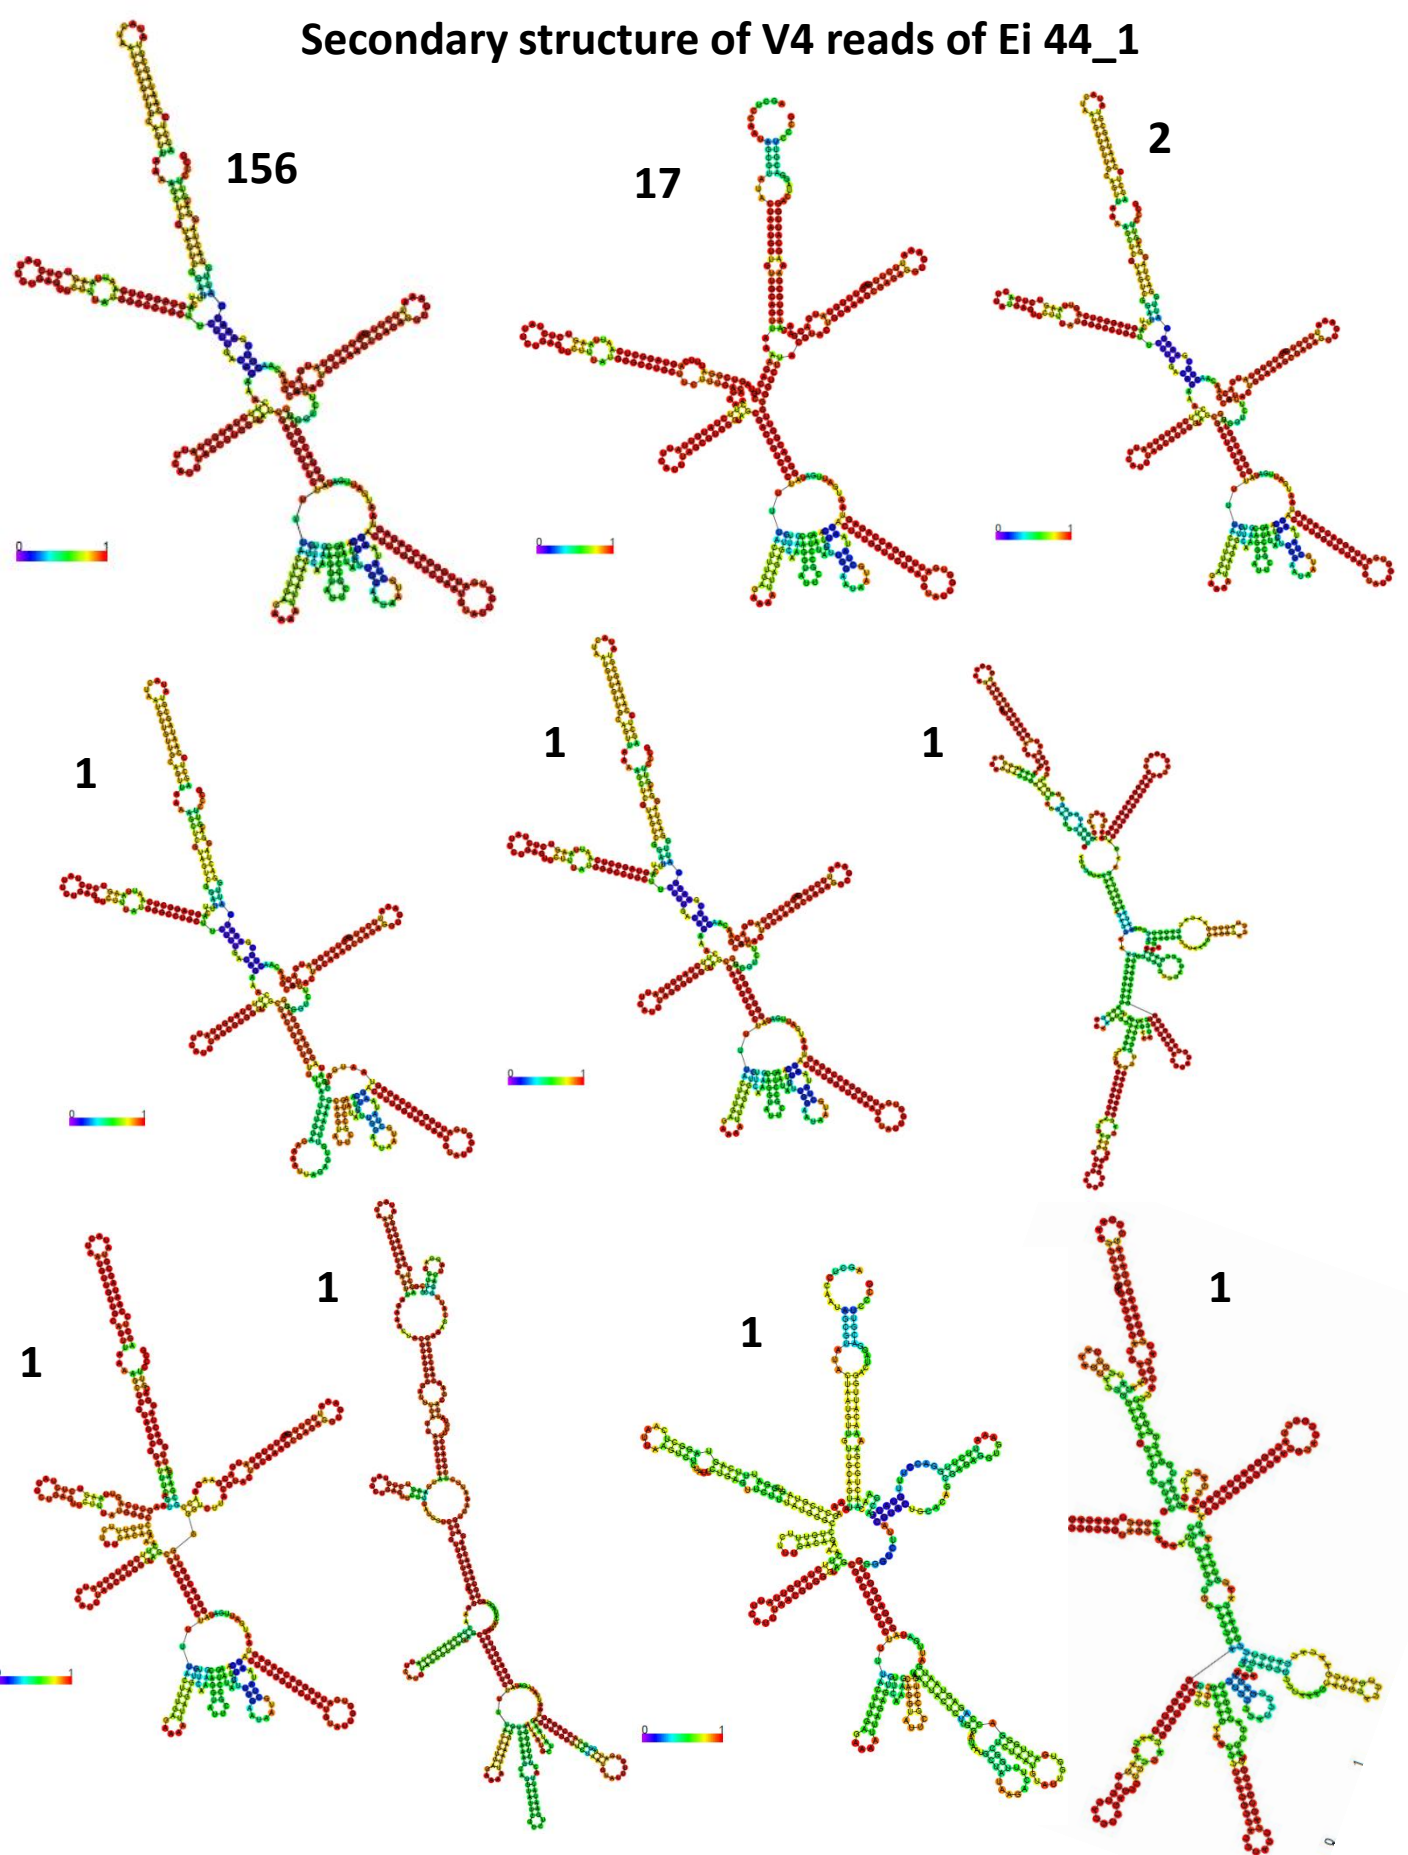

Supplement: pone.0104297.s002.pdf [file pone.0104297.s002.pdf]
