# Supplementary material for: Intracellular Diversity of the V4 and V9 Regions of the 18S rRNA in Marine Protists (Radiolarians) Assessed by High-Throughput Sequencing
Source: PubMed Central journal article supplement (PMC4121268; doi:10.1371/journal.pone.0104297), 2014-08-04
Supplement: pone.0104297.s003.pdf [file pone.0104297.s003.pdf]

## Variability hotspot region of the V9

Reference V9 sequences of Acantharia

GTGCTCCTACCGATTGGATGATTGGGATTGTAGATT-ATA--GGTATCTGTCATGTGTTACATTGCATTTTGAC-AACTTAAACCAACCTAATCATCTAGAGGAAGGAGAAGTCGTAACAAGGTTTCC

Ei 44 -1 / Ei 44-2  
Common V9 amplicons (n=14)

GTGCTCCTACCGATTGGATGATTGGGATTGATTGATTGCGTATTCTCATGAGGGTACGTTAAAACAACCTAATCAAACCTAATCATCTAGAGGAAGGAGAAGTCGTAACAAGGTTTCC

Ei 44 -1 / Ei 44-2  
Non-common V9 amplicons (n=73)

GTGCTCCTACCGACTTGGTAATGATTGGTAAAGACTTTTG-GGAAGTTGATTTAGCGTATTTCTCATTGAGGGATACG+TAAAACAACCTAATCAAACCTAAT-CATCTAGAGGAAGGAGAAGTCGTAACAAGGTTTCC

Pec 16-1 / Pec 16-2  
Common V9 amplicons (n=14)

GTGCTCCTACCGATTGGTAATGATTGGTAAAGACTTTGGTAATTG-ATTG-ACGACCTGCAT-GTCAGACGGATGTTGAC-AACTTTGATCAAACCTAAT-CATCTAGAGGAAGG-AGAAGTCGTAACAAGGTTTCC

Pec 16-1 / Pec 16-2  
Non-common V9 amplicons (n=55)

GTGCTCCTACCGACTTGGTAATGATTGGTAAAGACTCTTGGTAATTG-TATTGTACGAGGAGTTAACCTGCATTGTC-AGACGGTAGTATGTTGTAC-AACTTTGATCAAACCTAATC-ATCTAGAGGAAGGAGAAGTCGTAACAAGGTTTCC
