# Supplementary material for: Intracellular Diversity of the V4 and V9 Regions of the 18S rRNA in Marine Protists (Radiolarians) Assessed by High-Throughput Sequencing
Source: PubMed Central journal article supplement (PMC4121268; doi:10.1371/journal.pone.0104297), 2014-08-04
Supplement: pone.0104297.s004.pdf [file pone.0104297.s004.pdf]

| Samples  | Region | Raw amplicons | AmpliconNoise denoising |                   |                                        |                                         | Acacia denoising |                                        |                                         |                       |                       |
|----------|--------|---------------|-------------------------|-------------------|----------------------------------------|-----------------------------------------|------------------|----------------------------------------|-----------------------------------------|-----------------------|-----------------------|
|          |        |               | AmpliconNoise (T)       | AmpliconNoise (U) | Amplicons with exact distal primer (T) | Amplicons with exact distal primers (U) | Acacia denoising | Amplicons with exact distal primer (T) | Amplicons with exact distal primers (U) | Chimera detection (T) | Chimera detection (U) |
| Ei 44_1  | V4     | 6942          | 463                     | 25                | 408                                    | 7                                       | 501              | 210                                    | 30                                      | 209                   | 29                    |
| Ei 44_2  | V4     | 7197          | 3059                    | 83                | 2797                                   | 21                                      | 3156             | 1083                                   | 106                                     | 1073                  | 96                    |
| Ei 45    | V4     | 5142          | 2974                    | 51                | 2809                                   | 19                                      | 2998             | 1287                                   | 134                                     | 1284                  | 131                   |
| Pec 16_1 | V4     | 2444          | 203                     | 3                 | 0                                      | 0                                       | 191              | 13                                     | 8                                       | 13                    | 8                     |
| Pec 16_2 | V4     | 1081          | 73                      | 2                 | 0                                      | 0                                       | 69               | 0                                      | 0                                       | 0                     | 0                     |
| Ses 11   | V4     | 5460          | 983                     | 29                | 288                                    | 8                                       | 1100             | 193                                    | 29                                      | 193                   | 29                    |
| Ses 60   | V4     | 1088          | 78                      | 8                 | 54                                     | 3                                       | 151              | 16                                     | 6                                       | 16                    | 6                     |
| Vil 32   | V4     | 2906          | 1279                    | 11                | 1247                                   | 2                                       | 1199             | 411                                    | 20                                      | 411                   | 20                    |
| Ei 44_1  | V9     | 2746          | 1167                    | 72                | 1156                                   | 53                                      | 2168             | 1961                                   | 129                                     | 1960                  | 128                   |
| Ei 44_2  | V9     | 3899          | 2244                    | 89                | 2225                                   | 64                                      | 3181             | 2747                                   | 127                                     | 2746                  | 126                   |
| Ei 45    | V9     | 1331          | 715                     | 46                | 713                                    | 40                                      | 1097             | 974                                    | 61                                      | 974                   | 61                    |
| Pec 16_1 | V9     | 1538          | 1214                    | 38                | 1207                                   | 25                                      | 1341             | 1211                                   | 49                                      | 1212                  | 49                    |
| Pec 16_2 | V9     | 1330          | 1052                    | 26                | 1050                                   | 21                                      | 1127             | 1050                                   | 41                                      | 1050                  | 41                    |
| Ses 11   | V9     | 3913          | 2563                    | 74                | 2555                                   | 56                                      | 2916             | 2617                                   | 129                                     | 2617                  | 129                   |
| Ses 60   | V9     | 2488          | 1751                    | 49                | 1742                                   | 31                                      | 2075             | 1810                                   | 73                                      | 1810                  | 73                    |
| Vil 32   | V9     | 1793          | 1258                    | 28                | 1254                                   | 21                                      | 1566             | 1453                                   | 31                                      | 1453                  | 31                    |
