# Supplementary material for: Intracellular Diversity of the V4 and V9 Regions of the 18S rRNA in Marine Protists (Radiolarians) Assessed by High-Throughput Sequencing
Source: PubMed Central journal article supplement (PMC4121268; doi:10.1371/journal.pone.0104297), 2014-08-04
Supplement: pone.0104297.s005.pdf [file pone.0104297.s005.pdf]

|                         | Replicates          | Region | Non-filtered amplicons assigned to Radiolaria |                  | Number of OTUs at different identity cut-off levels |    |    |    |    |    |    |    |    |    |    |    |    |    |    |    |    |    |    |
|-------------------------|---------------------|--------|-----------------------------------------------|------------------|-----------------------------------------------------|----|----|----|----|----|----|----|----|----|----|----|----|----|----|----|----|----|----|
|                         |                     |        | Total amplicons                               | Unique amplicons | 99                                                  | 98 | 97 | 96 | 95 | 94 | 93 | 92 | 91 | 90 | 89 | 88 | 87 | 86 | 85 | 84 | 83 | 82 | 81 |
| <b>Common reads</b>     | Ei 44-1 / Ei 44-2   | V4     | 1981                                          | 45               | 10                                                  | 5  | 2  | 2  | 1  | 1  | 1  | 1  | 1  | 1  | 1  | 1  | 1  | 1  | 1  | 1  | 1  | 1  | 1  |
|                         | Pec 16-1 / Pec 16-2 | V4     | 1131                                          | 32               | 3                                                   | 2  | 1  | 1  | 1  | 1  | 1  | 1  | 1  | 1  | 1  | 1  | 1  | 1  | 1  | 1  | 1  | 1  | 1  |
|                         | Ei 44-1 / Ei 44-2   | V9     | 1633                                          | 14               | 6                                                   | 5  | 3  | 2  | 2  | 2  | 2  | 2  | 2  | 2  | 2  | 2  | 2  | 2  | 2  | 1  | 1  | 1  | 1  |
|                         | Pec 16-1 / Pec 16-2 | V9     | 1635                                          | 14               | 4                                                   | 4  | 3  | 3  | 3  | 3  | 2  | 2  | 2  | 2  | 2  | 2  | 2  | 2  | 2  | 1  | 1  | 1  | 1  |
| <b>Non-common reads</b> | Ei 44-1 / Ei 44-2   | V4     | 1208                                          | 385              | 90                                                  | 28 | 18 | 14 | 10 | 9  | 8  | 6  | 6  | 6  | 6  | 6  | 5  | 5  | 3  | 2  | 2  | 2  | 1  |
|                         | Pec 16-1 / Pec 16-2 | V4     | 193                                           | 176              | 37                                                  | 9  | 5  | 2  | 1  | 1  | 1  | 1  | 1  | 1  | 1  | 1  | 1  | 1  | 1  | 1  | 1  | 1  | 1  |
|                         | Ei 44-1 / Ei 44-2   | V9     | 106                                           | 73               | 52                                                  | 25 | 17 | 13 | 10 | 8  | 6  | 4  | 4  | 4  | 3  | 3  | 3  | 3  | 3  | 3  | 2  | 2  | 2  |
|                         | Pec 16-1 / Pec 16-2 | V9     | 71                                            | 55               | 41                                                  | 15 | 10 | 7  | 6  | 5  | 5  | 4  | 4  | 4  | 4  | 4  | 4  | 3  | 3  | 3  | 3  | 3  | 3  |
