# Supplementary material for: Intracellular Diversity of the V4 and V9 Regions of the 18S rRNA in Marine Protists (Radiolarians) Assessed by High-Throughput Sequencing
Source: PubMed Central journal article supplement (PMC4121268; doi:10.1371/journal.pone.0104297), 2014-08-04
Supplement: pone.0104297.s006.pdf [file pone.0104297.s006.pdf]

|          |    |                |                 | Number of overlapped amplicons |                         |        |          |          |        |        |        |         |         |       |          |          |        |        |        |  |
|----------|----|----------------|-----------------|--------------------------------|-------------------------|--------|----------|----------|--------|--------|--------|---------|---------|-------|----------|----------|--------|--------|--------|--|
|          |    |                |                 | Ei 44_1                        | Ei 44_2                 | Ei 45  | Pec 16_1 | Pec 16_2 | Ses 11 | Ses 60 | Vil 32 | Ei 44_1 | Ei 44_2 | Ei 45 | Pec 16_1 | Pec 16_2 | Ses 11 | Ses 60 | Vil 32 |  |
|          |    | Total amplicon | Unique amplicon | Unique amplicon                | Redundant amplicon (>1) | V4     | V4       | V4       | V4     | V4     | V4     | V4      | V9      | V9    | V9       | V9       | V9     | V9     | V9     |  |
| Ei 44_1  | V4 | 190            | 18 (15)         | 7                              | 2                       | 7      | -        | -        | -      | -      | -      | -       | -       | -     | -        | -        | -      | -      | -      |  |
| Ei 44_2  | V4 | 957            | 52 (37)         | 21                             | 13                      | 3      | 21       | -        | -      | -      | -      | -       | -       | -     | -        | -        | -      | -      | -      |  |
| Ei 45    | V4 | 907            | 76 (52)         | 23                             | 17                      | 0 (2)* | 0 (2)    | 23       | -      | -      | -      | -       | -       | -     | -        | -        | -      | -      | -      |  |
| Pec 16_1 | V4 | 13             | 8 (5)           | 3                              | 2                       | 0      | 0        | 0        | 3      | -      | -      | -       | -       | -     | -        | -        | -      | -      | -      |  |
| Pec 16_2 | V4 | 0              | 0               | 0                              | 0                       | 0      | 0        | 0        | 0      | 0      | -      | -       | -       | -     | -        | -        | -      | -      | -      |  |
| Ses 11   | V4 | 4              | 1               | 1                              | 1                       | 0      | 0        | 0        | 0      | 0      | 1      | -       | -       | -     | -        | -        | -      | -      | -      |  |
| Ses 60   | V4 | 0              | 0               | 0                              | 0                       | 0      | 0        | 0        | 0      | 0      | 0      | 0       | -       | -     | -        | -        | -      | -      | -      |  |
| Vil 32   | V4 | 399            | 18 (15)         | 1                              | 1                       | 0      | 0        | 0        | 0      | 0      | 0      | 1       | -       | -     | -        | -        | -      | -      | -      |  |
| Ei 44_1  | V9 | 656            | 18 (14)         | 7                              | 7                       | -      | -        | -        | -      | -      | -      | -       | 7       | 3     | 1        | 0        | 0      | 0      | 0      |  |
| Ei 44_2  | V9 | 1001           | 11 (5)          | 7                              | 4                       | -      | -        | -        | -      | -      | -      | -       | -       | 4     | 1        | 0        | 0      | 0      | 0      |  |
| Ei 45    | V9 | 577            | 6 (3)           | 2                              | 2                       | -      | -        | -        | -      | -      | -      | -       | -       | -     | 2        | 0        | 0      | 0      | 0      |  |
| Pec 16_1 | V9 | 832            | 4 (3)           | 1                              | 1                       | -      | -        | -        | -      | -      | -      | -       | -       | -     | -        | 1        | 1      | 0      | 0      |  |
| Pec 16_2 | V9 | 785            | 7 (6)           | 1                              | 1                       | -      | -        | -        | -      | -      | -      | -       | -       | -     | -        | -        | 1      | 0      | 0      |  |
| Ses 11   | V9 | 61             | 1               | 1                              | 1                       | -      | -        | -        | -      | -      | -      | -       | -       | -     | -        | -        | -      | 1      | 0 (1)  |  |
| Ses 60   | V9 | 108            | 3 (2)           | 1                              | 1                       | -      | -        | -        | -      | -      | -      | -       | -       | -     | -        | -        | -      | -      | 1      |  |
| Vil 32   | V9 | 1037           | 1               | 1                              | 1                       | -      | -        | -        | -      | -      | -      | -       | -       | -     | -        | -        | -      | -      | -      |  |

\* Figures in parentheses showed the number of sequences with one substitution or indel.
